# Supplementary material for: Prenatal exposure to persistent organic pollutants as a risk factor of offspring metabolic syndrome development during childhood
Source: publisher site journal article supplement (doi:10.1515/reveh-2020-0113), 2021-04-15
Supplement: Supplementary file 1 [file j_reveh-2020-0113_suppl.pdf]

Supplementary Materials

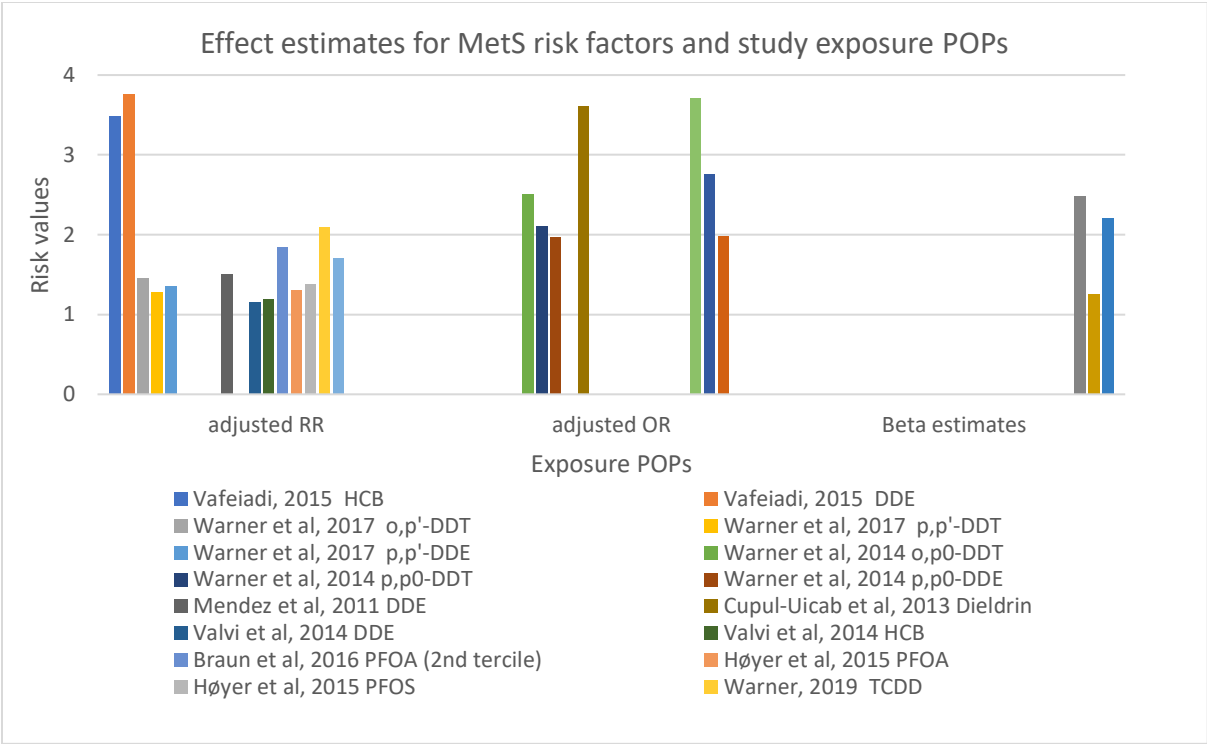

Figure 1.0 Effect estimates for MetS risk factors and exposure POPs per study

# PERSISTENT ORGANIC POLLUTANTS AND METABOLIC SYNDROME

**Table 2.0** Characteristics and results summaries of studies included in review

| <b>First Author, Year</b> | <b>Country</b> | <b>Study Participants: No. of Subjects, Characteristics, Time of gestation at enrollment</b> | <b>Baseline Year</b> | <b>Follow-up Period after birth Years(y), months (m)</b> | <b>Exposure, Measured Chemicals</b>                                            | <b>Outcome: Measurement on child</b>                                                                                          | <b>Adjustment</b>                                                                                                                                                     | <b>Results Relative Risk (RR) / Odds Ratio (OR) (95% Confidence Interval)</b>                                                             | <b>Limitations</b>                                                                                                                                                                 |
|---------------------------|----------------|----------------------------------------------------------------------------------------------|----------------------|----------------------------------------------------------|--------------------------------------------------------------------------------|-------------------------------------------------------------------------------------------------------------------------------|-----------------------------------------------------------------------------------------------------------------------------------------------------------------------|-------------------------------------------------------------------------------------------------------------------------------------------|------------------------------------------------------------------------------------------------------------------------------------------------------------------------------------|
| Vafeiadi, 2015            | Greece         | 689 Mother-Child pairs<br>First trimester                                                    | 2007                 | 4 y                                                      | PCB congeners (118, 138, 153, 156, 170, and 180), HCB, DDT and DDE, and BDE-47 | Obesity as BMI z-score using IOTF definitions, blood Pressure, central adiposity as WC $\geq$ 90th percentile for age and sex | Maternal: prepregnancy BMI, age at birth, parity, education, smoking during pregnancy, breastfeeding duration. Child: birth weight & BMI                              | HCB and obesity RR=8.14 (1.85, 35.81); HCB and abdominal obesity RR= 3.49 (1.08, 11.28); DDE and abdominal obesity RR= 3.76 (1.70, 8.30). | 1) Lack of postnatal exposure measurement at other time points. 2) socioeconomics as unmeasured covariates 3)lack of multiple comparisons since some outcomes are inter-correlated |
| Warner, 2019              | Italy          | 611 offspring<br>Seveso Second Generational Study Mothers                                    | 2014                 | Average of 23.7 y (range: 2-39yrs)                       | TCDD                                                                           | Overweight as BMI $\geq$ 25kg/m <sup>2</sup> and <30kg/m <sup>2</sup> , Obese as $\geq$ 30 kg/m <sup>2</sup> ; #MetS          | Maternal age at explosion, age at pregnancy, smoking during pregnancy, BMI, hypertension family history. Child: age, sex, and smoking. Primary wage-earner education. | In sons only, maternal TCDD was associated with increase risk of metabolic syndrome adj- RR=2.09 (1.09, 4.02).                            | 1) participation rate of 66.4% 2) reliance on a modeled estimate of maternal TCDD at the time of pregnancy is likely a source of exposure misclassification                        |

# PERSISTENT ORGANIC POLLUTANTS AND METABOLIC SYNDROME

|                       |        |                                                                                                             |           |       |                                            |                                                                                                                                 |                                                                                                                                                           |                                                                                                                                                                          |                                                                                                                                                                                                                                                                                        |
|-----------------------|--------|-------------------------------------------------------------------------------------------------------------|-----------|-------|--------------------------------------------|---------------------------------------------------------------------------------------------------------------------------------|-----------------------------------------------------------------------------------------------------------------------------------------------------------|--------------------------------------------------------------------------------------------------------------------------------------------------------------------------|----------------------------------------------------------------------------------------------------------------------------------------------------------------------------------------------------------------------------------------------------------------------------------------|
| Fleisch, 2017         | U.S.A. | 665 Mother-Child pairs, Mothers part of Project Viva in Boston, Massachusetts, 9.6 (median) weeks gestation | 1999-2002 | 7.7 y | PFASs (PFOA, PFOS, PFNA, PFHxS, and PFDeA) | Leptin, adiponectin, fasting insulin and glucose levels, <b>THOMA-IR</b>                                                        | Maternal: age, education. Child: age, sex, & race/ethnicity. Neighborhood census tract at mid-childhood (median household income, percent below poverty). | No evidence of adverse effect of early-life PFAS exposure on metabolic function in mid-childhood. Children with higher PFAS concentrations had lower insulin resistance. | 1) Generalizability is limited to study's cohort                                                                                                                                                                                                                                       |
| Manzano-Salgado, 2017 | Spain  | 1,154 Children at 6 months, 1,230 Children at 4y, 1,086 Children at 7y                                      | 2003–2008 | 7 y   | PFHxS, PFOS, PFOA, PFNA                    | Overweight as BMI z-score $\geq 85$ th percentile, WC, BP. Only at 4y: HDL-C, LDL-C, TGs, <b>Cardiometabolic-risk (CM-risk)</b> | Maternal: region of residence, country of birth, parity, prepregnancy BMI, previous breastfeeding, age at follow-up. Child: age & sex                     | Prenatal PFAS concentrations were not associated with individual outcomes or the combined CM-risk score.                                                                 | 1) Fasting blood samples were inconsistent per study regions<br>2) lipid levels only measured in subset of sample at 4y<br>3) CM-Risk score doesn't include glucose homeostasis<br>4) possible interaction between PFOA and BMI z-scores at 4y & 7y with longer breastfeeding duration |

# PERSISTENT ORGANIC POLLUTANTS AND METABOLIC SYNDROME

|                  |      |                                                                   |           |      |                                                                                                        |                                                                                                                                          |                                                                          |                                                                                                                                                                                                                                                                                                                             |                                                                                                                                  |
|------------------|------|-------------------------------------------------------------------|-----------|------|--------------------------------------------------------------------------------------------------------|------------------------------------------------------------------------------------------------------------------------------------------|--------------------------------------------------------------------------|-----------------------------------------------------------------------------------------------------------------------------------------------------------------------------------------------------------------------------------------------------------------------------------------------------------------------------|----------------------------------------------------------------------------------------------------------------------------------|
| Warner<br>, 2017 | U.S. | 240 child-mother pairs<br>Gestation at <20 wks<br>CHAMACOS cohort | 1999-2000 | 12 y | o,p'-DDT, p,p'- DDT, and p,p'-DDE - samples taken at 26 weeks gestation (n = 215) or delivery (n = 25) | Overweight as BMI-z scores between ≥85th and <95th percentile, obese as BMI-z-scores ≥95th percentile, increased WC as ≥ 90th percentile | Maternal: prepregnancy BMI, years in the U.S. at childbirth, puberty age | At 12 years, boys only Obesity and o,p'-DDT RR=1.46 (1.07, 1.97), obesity and p,p'-DDT RR=1.28 (1.01, 1.64), Obesity and p,p'-DDE RR=1.35 (0.98, 1.87). In 12y old boys only: Increased WC and o,p'-DDT RR=1.53 (1.53, 2.10), increased WC and p,p'-DDT RR=1.36 (1.05, 1.76),increased WC and p,p'-DDE RR=1.39 (0.97, 1.98) | 1) Limited number of children with anthropometric measures. 2) No collection of comprehensive dietary and physical activity data |
| Warner<br>, 2014 | U.S. | 261 child-mother pairs<br>Gestation at <20 wks<br>CHAMACOS cohort | 1999-2000 | 9 y  | o,p'-DDT, p,p'- DDT, and p,p'-DDE - samples taken at 26 weeks gestation (n = 242) or delivery (n = 19) | Overweight as BMI-z scores between >85th and <95th percentile, obese as BMI-z-scores ≥ 95th percentile, WC, percent body fat             | Maternal prepregnancy BMI, time in the U.S. at birth                     | Boys only-overweight/ obese: o,p0-DDT, adj OR = 2.5 (1.0, 6.3), p,p0-DDT, adj OR = 2.1 (1.0, 4.5), p,p0-DDE, adj OR = 1.97, (0.94, 4.13). Increased WC odds: o,p'-DDT adj OR= 1.98 (0.95, 4.11), p,p'-DDT adj OR = 2.05 (1.10, 3.82)                                                                                        | 1) Limited number of children with anthropometric measures. 2) Percentage of body fat not standardized for age or sex.           |

# PERSISTENT ORGANIC POLLUTANTS AND METABOLIC SYNDROME

|                     |               |                                            |                          |         |                                                                                                             |                                                                                                                         |                                                                                      |                                                                                                                                                                                                                                                                                                                            |                                         |
|---------------------|---------------|--------------------------------------------|--------------------------|---------|-------------------------------------------------------------------------------------------------------------|-------------------------------------------------------------------------------------------------------------------------|--------------------------------------------------------------------------------------|----------------------------------------------------------------------------------------------------------------------------------------------------------------------------------------------------------------------------------------------------------------------------------------------------------------------------|-----------------------------------------|
| Tang-Péronard, 2014 | Faroe Islands | 539 child-mother pairs<br>Singleton births | November 1997-March 2000 | 5-7y    | PCBs and DDE<br>Maternal blood collected at 34 wk gestation. Breast milk collected 4-5 d after parturition. | Overweight as WC<br>>62.12 cm in boys and > 61.86 cm in girls, obesity as WC > 69.53 cm in boys and > 69.70 cm in girls | Maternal: BMI, age, & parity,                                                        | Estimates for PCBs in 4th quartile and WC in girls with normal weight mothers = 1.25 (0.04, 2.45) P=0.04; Estimate for PCBs in 4th quartile and WC in girls with overweight mothers= 2.48 (1.10, 3.85) P=0.001. Estimate for DDE and WC in girls with overweight mothers= 2.21 (0.84, 3.56). No associations seen in boys. | 1) Seafood diet not taken into account. |
| Tang-Péronard, 2015 | Faroe Islands | 520 child-mother pairs<br>Singleton births | November 1997-March 2000 | 5y & 7y | PCBs, DDE, & HCB - Collected at 34 wks gestation. Breast milk collected 4-5d after parturition.             | Non-fasting Insulin levels, Leptin                                                                                      | maternal age, parity, prepregnancy BMI, BMI at 5y of age, time of day blood sampling | Girls only- PCBs 4th quartile and high non-fasting insulin OR=3.71 (1.36, 10.010); DDE 4th quartile and high non-fasting insulin OR=2.75 (1.09, 6.90); HCB 4th quartile and high non-fasting insulin OR=1.98 (1.06, 3.69) compared to lowest quartile.                                                                     | Fasting blood samples not collected     |

# PERSISTENT ORGANIC POLLUTANTS AND METABOLIC SYNDROME

|                   |                                 |                                                                                                                                      |                        |           |                                                                                                                    |                                                                                             |                                                                                                                    |                                                                                                                                                                                                    |                                                                                                                                                                                                             |
|-------------------|---------------------------------|--------------------------------------------------------------------------------------------------------------------------------------|------------------------|-----------|--------------------------------------------------------------------------------------------------------------------|---------------------------------------------------------------------------------------------|--------------------------------------------------------------------------------------------------------------------|----------------------------------------------------------------------------------------------------------------------------------------------------------------------------------------------------|-------------------------------------------------------------------------------------------------------------------------------------------------------------------------------------------------------------|
| Høyer, 2015       | Greenland and Kharkiv (Ukraine) | 1,023 mother-child pairs<br>Singleton births<br>INUENDO cohort                                                                       | May 2002-February 2004 | 5-9y      | PFOA, PFOS<br>-Blood sample taken at a mean ( $\pm$ SD) gestational of $24 \pm 10$ weeks                           | Overweight BMI z-score $> 1$ SD, **WHtR $> 0.5$ high risk                                   | Maternal: age at birth, parity, smoking, education, prepregnancy BMI, country of residence.<br>Child: age and sex. | WHtR $> 0.5$ and PFOA adj. RR=1.30 (0.97, 1.74), WHtR $> 0.5$ and PFOS adj. RR=1.38 (1.05, 1.82)                                                                                                   | Inconsistent measuring equipment used, large number of missing data, possible exposure misclassification                                                                                                    |
| Mendez, 2011      | Spain                           | 518 child-mother pairs<br>First trimester of pregnancy                                                                               | 2004-2006              | 14 months | DDE, HCB, $\beta$ -HCH, & PCBs (118, 138, 153, & 180).                                                             | Overweight as BMI z-scores $\geq 1.44$ , corresponding to the 85th percentile               | gestational age, breast-feeding at 6m, firstborn; maternal: smoking, education, age at delivery                    | DDE was associated with elevated BMI at 14 months RR = 1.50 (1.11, 2.03)                                                                                                                           | 1) BMI-z scores and growth were used and no direct measures of adiposity were used. 2) maternal exposure measurements were taken only in early pregnancy 3) modest sample size 4) short follow-up time      |
| Cupul-Uicab, 2013 | U.S.                            | 1,915 children<br>Collaborative Perinatal Project<br>Maternal samples collected at 3rd trimester & delivery<br>Singleton live-births | 1959-1965              | 7y        | $\beta$ -HCH, p,p'-DDE, p,p'-DDT, dieldrin, heptachlor epoxide, HCB, transnonachlor, oxychlordan, & PCBs congeners | Overweight as BMI z-scores $> 90$ th percentile, obese as BMI z-scores $> 97$ th percentile | Maternal: race, education, socioeconomic index, prepregnancy BMI, smoking.<br>Child birth order, child's age       | Obesity with dieldrin exposure OR= 3.6 (1.3, 10.5) for the fourth quintile and 2.3 (0.8, 7.1) for the highest quintile. Overweight and BMI were not associated with DDE, DDT, HCB, or PCB exposure | 1) Interactions (i.e., exposure with maternal smoking and child's sex) were not replicated in the present study. 2) Only high levels of exposure were measured in this study (lower levels of not measured) |

# PERSISTENT ORGANIC POLLUTANTS AND METABOLIC SYNDROME

|             |       |                                            |           |          |                                                                                         |                                                  |                                                                                                                                                           |                                                                                                                                                                                                                                 |                                                                                                                                                      |
|-------------|-------|--------------------------------------------|-----------|----------|-----------------------------------------------------------------------------------------|--------------------------------------------------|-----------------------------------------------------------------------------------------------------------------------------------------------------------|---------------------------------------------------------------------------------------------------------------------------------------------------------------------------------------------------------------------------------|------------------------------------------------------------------------------------------------------------------------------------------------------|
|             |       |                                            |           |          | (28, 52, 74, 105, 118, 138, 153, 170, 180, 194, & 203)                                  |                                                  |                                                                                                                                                           |                                                                                                                                                                                                                                 |                                                                                                                                                      |
| Valvi, 2012 | Spain | 344 child-mother pairs<br>20w gestation    | 1997-1998 | 6-7y     | Umbilical cord blood -DDE, DDT, HCB, & PCBs congeners (28, 52, 101, 118, 138, 153, 180) | Overweight BMI z-score $\geq$ 85th percentile    | Child: birth weight. Maternal: pregnancy BMI, smoking during pregnancy, parity, education, social class, age, breast-feeding duration.                    | Overweight and PCB exposure in 3rd tertile RR=1.70 (1.09, 2.64), overweight and DDE exposure in 2nd tertile R= 1.67 (1.10, 2.55). Associations between overweight and PCB and DDE exposure were stronger in girls than in boys. | 1) Small sample size 2) cord blood lipid concentrations only in a subgroup of children (n = 90), and thus OC concentrations were not lipid adjusted. |
| Valvi, 2014 | Spain | 1285 child-mother pairs<br>First-trimester | 2003-2008 | 6m & 14m | DDE, HCB, & PCB congeners (153, 138, 180)                                               | Overweight as BMI z-score $\geq$ 85th percentile | Maternal: serum lipid content, country of origin, social class, age at delivery, prepregnancy BMI, smoking during pregnancy. Infant: sex, exact age at 6- | At 14m of age- Overweight and DDE RR=1.15 (1.03, 1.28), overweight and HCB RR=1.19 (1.05, 1.34).                                                                                                                                | 1) BMI and weight as indirect measures of total body fat 2) exposure dilution may differ among infants                                               |

# PERSISTENT ORGANIC POLLUTANTS AND METABOLIC SYNDROME

|                |      |                                                       |                                   |    |                                                                                                |                                                                                                 |                                                                                                                                                                                                                                                                                                                                                                             |                                                                                                                                                                 |                                                                 |
|----------------|------|-------------------------------------------------------|-----------------------------------|----|------------------------------------------------------------------------------------------------|-------------------------------------------------------------------------------------------------|-----------------------------------------------------------------------------------------------------------------------------------------------------------------------------------------------------------------------------------------------------------------------------------------------------------------------------------------------------------------------------|-----------------------------------------------------------------------------------------------------------------------------------------------------------------|-----------------------------------------------------------------|
|                |      |                                                       |                                   |    |                                                                                                |                                                                                                 | month exam.<br>Gestational age,<br>exclusive<br>breastfeeding<br>duration.                                                                                                                                                                                                                                                                                                  |                                                                                                                                                                 |                                                                 |
| Braun,<br>2016 | U.S. | 204 child-<br>mother pairs<br>16+/- 3 wk<br>gestation | March<br>2003-<br>January<br>2006 | 8y | Maternal<br>blood<br>samples at<br>16-26wk<br>gestation<br>-PFOA,<br>PFOS,<br>PFNA, &<br>PFHxS | Overweight/<br>obesity as<br>BMI z-scores<br>≥85th<br>percentile,<br>WC, body fat<br>percentage | Urinary BPA,<br>breastfeeding<br>duration,<br>weekly<br>gestational<br>weight gain.<br>Maternal: age,<br>race, education,<br>parity,<br>employment,<br>marital status,<br>depressive<br>symptoms, BMI<br>at 16 wks<br>gestation,<br>fruit/vegetable<br>consumption,<br>fish<br>consumption,<br>prenatal vitamin<br>use, serum<br>cotinine<br>concentrations.<br>Child: age, | PFOA 2nd tercile<br>and<br>overweight/obesity<br>adj. RR=1.84<br>(0.97, 3.50);<br>PFOA 3rd tercile<br>and<br>overweight/obesity<br>adj. RR=1.54<br>(0.77, 3.07) | 1) limited<br>adiposity<br>measurements 2)<br>small sample size |

WC: waist circumference, IOTF: International Obesity Task Force, SBP: systolic blood pressure, DBP: diastolic blood pressure, WHtR: Waist-to-height ratio



## PERSISTENT ORGANIC POLLUTANTS AND METABOLIC SYNDROME

#MetS defined as: presence of three or more of the following: (1) WC  $\geq$  80 cm (female) or  $\geq$  94 cm (male); (2) elevated TGs  $\geq$  150 mg/dL or current use of TGs treatment; (3) HDL-C  $<$  50 mg/dL (female) or  $<$  40 mg/dL (male) or current use of HDL-C reducing treatment; (4) SBP  $\geq$  130 mmHg, DBP  $\geq$  85 mmHg, or current use of antihypertensive medication; (5) fasting glucose  $\geq$  100 mg/dL or current use of diabetes medication.

## Cardiometabolic risk defined as: the sum of the standardized z-scores for WC, BP, and the mean of the HDL-C and TG z-scores, with HDL-C multiplied by -1

\*\*WHtR high risk for cardiometabolic morbidity

$\bar{I}$  insulin resistance by calculating the HOMA-IR as  $[\text{fasting glucose (mg/dL)} \times \text{fasting insulin (mU/L)}] / 405$

# PERSISTENT ORGANIC POLLUTANTS AND METABOLIC SYNDROME

**Table 3.0** Summary of effect estimates per study and POPs

| Study                   | Exposure chemical | Adj. RR | Adj. OR | Beta estimates | Major POP Category | Outcome measurement             |
|-------------------------|-------------------|---------|---------|----------------|--------------------|---------------------------------|
| Vafeiadi, 2015          | HCB               | 3.49    |         |                | OC                 | Abdominal obesity               |
|                         | DDE               | 3.76    |         |                | OC                 | Abdominal obesity               |
| Warner et al, 2017      | o,p'-DDT          | 1.46    |         |                | OC                 | overweight/obesity only in boys |
|                         | p,p'-DDT          | 1.28    |         |                | OC                 | overweight/obesity only in boys |
|                         | p,p'-DDE          | 1.35    |         |                | OC                 | overweight/obesity only in boys |
| Warner et al, 2014      | o,p0-DDT          |         | 2.5     |                | OC                 | overweight/obesity only in boys |
|                         | p,p0-DDT          |         | 2.1     |                | OC                 | overweight/obesity only in boys |
|                         | p,p0-DDE          |         | 1.97    |                | OC                 | overweight/obesity only in boys |
| Mendez et al, 2011      | DDE               | 1.5     |         |                | OC                 | overweight                      |
| Cupul-Uicab et al, 2013 | Dieldrin          |         | 3.6     |                | OC                 | obesity                         |
| Valvi et al, 2014       | DDE               | 1.15    |         |                | OC                 | overweight                      |
|                         | HCB               | 1.19    |         |                | OC                 | overweight                      |
| Braun et al, 2016       | PFOA              | 1.84    |         |                | PFASs              | overweight/obesity              |
| Høyer et al, 2015       | PFOA              | 1.30    |         |                | PFASs              | Waist-to-height-ratio           |
|                         | PFOS              | 1.38    |         |                | PFASs              | Waist-to-height-ratio           |
| Warner, 2019            | TCDD              | 2.09    |         |                | Dioxin             | Met Syn                         |
| Valvi et al, 2012       | PCBs              | 1.7     |         |                | PCBs               | overweight                      |
| Tang-Péronard, 2015     | PCBs              |         | 3.71    |                | PCBs               | Insulin only in girls           |
|                         | DDE               |         | 2.75    |                | OC                 | Insulin only in girls           |
|                         | HCB               |         | 1.98    |                | OC                 | Insulin only in girls           |
| Tang-Péronard, 2014     | PCBs#             |         |         | 2.48           | PCBs               | WC                              |
|                         | PCBs*             |         |         | 1.25           | PCBs               | WC                              |
|                         | DDE#              |         |         | 2.21           | OC                 | WC                              |
| Fleisch, 2017           | PFASs             | Not sig |         |                | PFASs              | fasting insuling                |
| Manzano-Salgado, 2017   | PFASs             | Not sig |         |                | PFASs              | Cardiometabolic risk            |

## PERSISTENT ORGANIC POLLUTANTS AND METABOLIC SYNDROME

HCB: Hexachlorobenzene, DDE: Dichlorodiphenyldichloroethylene, DDT: Dichlorodiphenyltrichloroethane, PFOA: Perfluorooctanoic acid, PFOS: Perfluorooctanesulfonic acid, TCDD: 2,3,7,8-Tetrachlorodibenzodioxin, PCBs: Polychlorinated biphenyls

#Overweight mothers

\*Normal weight mothers
